1 **Association between neurofibromatosis type 1 and cerebrovascular diseases in**  
2 **children: a systematic review**

3 Beatriz Barreto-Duarte<sup>1,2,4,5\*</sup>, Fabiana H. Andrade-Gomes<sup>4\*</sup>, María B. Arriaga<sup>1,2,3</sup>, Mariana  
4 Araújo-Pereira<sup>1,2,6</sup>, Juan Manuel Cubillos-Angulo<sup>1,2,3</sup>, Bruno B. Andrade<sup>1,2,3,4,5,6,7</sup>

5  
6 <sup>1</sup>Instituto Gonçalo Moniz, Fundação Oswaldo Cruz, Salvador, Bahia 40296-710, Brazil  
7 <sup>2</sup>Multinational Organization Network Sponsoring Translational and Epidemiological  
8 Research (MONSTER) Initiative, Fundação José Silveira, Salvador, Bahia 40210-320,  
9 Brazil  
10 <sup>3</sup>Curso de Medicina, Faculdade de Tecnologia e Ciências (FTC), Salvador, Bahia 40290-  
11 150, Brazil  
12 <sup>4</sup>Universidade Salvador (UNIFACS), Laureate Universities, Salvador, Bahia 41720-200,  
13 Brazil  
14 <sup>5</sup>Programa de Pós-Graduação em Clínica Médica, Universidade Federal do Rio de  
15 Janeiro, Rio de Janeiro, Brazil.  
16 <sup>6</sup>Faculdade de Medicina, Universidade Federal da Bahia, Salvador, Bahia 0110-100,  
17 Brazil  
18 <sup>7</sup>Escola Bahiana de Medicina e Saúde Pública (EBMSP), Salvador, Bahia 40290-000,  
19 Brazil  
20

21 \*B.B.D and F.H.A.G equally contributed to the work.

22

23 **Corresponding authors:** [bruno.andrade@fiocruz.br](mailto:bruno.andrade@fiocruz.br)(BBA),  
24 [beatriz.duarte@monsterinitiative.com](mailto:beatriz.duarte@monsterinitiative.com) (BBD)

25

26

27 **Running head:** NF-1 and cerebrovascular disease in children

28

29

30 **ABSTRACT**

31 **Background:** Neurofibromatosis type 1 (NF-1) is an autosomal dominant disease that  
32 affects one in every 3000 individuals. This disease can present a wide range of clinical  
33 manifestations, ranging from skin abnormalities to severe vascular changes. Although  
34 little recognized, cerebrovascular diseases (CVD), often present since childhood and  
35 diagnosed late, may have clinical manifestations ranging from headache and cognitive  
36 deficits to aneurysm rupture causing death. Thus, the CVD play an important role in the  
37 clinical manifestations, the severity of the condition and the prognosis of patients with NF-  
38 1. This systematic review aims to summarize the body of evidence linking NF-1 and CVD  
39 the in children.

40

41

42 **Methods:** Two independent reviewers performed a systematic review on the PubMed  
43 and EMBASE search platforms, using the following key terms: "neurofibromatosis type  
44 1", "recklinghausen disease", "children", "adolescents", "stroke", "moyamoya disease",  
45 "vascular diseases", "cerebrovascular disorders", "aneurysm" and "congenital  
46 abnormalities". Studies focused on assessing the development of CVD in children with  
47 NF-1 were included.

48

49 **Results:** Seven studies met the inclusion criteria. Twelve different clinical manifestations  
50 have been associated with cerebrovascular changes in children with NF-1; 44,5% of  
51 diagnosed patients were asymptomatic.

52

53 **Conclusion:** The available evidence suggests that cerebrovascular diseases are related  
54 with the progression of NF-1, even in the absence of a clear clinical manifestation. In  
55 addition, better prognosis was observed when imaging tests were performed to screen  
56 for cerebrovascular changes. This generated early interventions and consequently more  
57 favorable outcomes.

58

59 **Key words:** Neurofibromatosis type 1; Cerebrovascular diseases; Children, Moyamoya.

60

## 61 INTRODUCTION

62 Neurofibromatosis type 1 (NF-1) is an autosomal dominant, chronic and progressive  
63 disease [1] with an incidence of approximately 1:3000 individuals and almost half of the  
64 cases of hereditary origin (familial NF) [2]. The alteration in the *NF1* gene, located at  
65 chromosome 17 q11.2, is responsible for the inability to synthesize the neurofibromin  
66 cytoplasmic protein, which acts as a modulator in cell growth and differentiation since  
67 uterine life, and which is expressed in the nervous system, endothelium and smooth  
68 muscle cells of blood vessels. The gold-standard diagnosis can be achieved through  
69 molecular genetic testing, which is related to high cost and low availability in the public  
70 health system [3] Frequently, diagnosis is based on the presence of two or more criteria  
71 that encompass the main clinical manifestations of the disease and that were established  
72 by the National Institutes of Health (NIH) Consensus Development Conference [4]. NF-1  
73 is constantly associated with vasculopathy and cerebrovascular abnormalities of  
74 pathophysiology that is still not understood [5-7]. Several cases have been reported in  
75 children, but the incidence of cerebrovascular diseases (CVD) associated with  
76 complications and the long-term impacts on these individuals is still poorly recognized,  
77 which warrants more studies on the topic [8].

78 There are multiple case reports in the literature of individuals with NF-1 that developed  
79 cerebrovascular diseases (CVD) [9] and heterogeneous neurological manifestations and  
80 several complications are present in this association [10] , which generates great  
81 morbidity and mortality in patients with this genetic condition [11]. The association of NF-1  
82 with CVD is described to result in a range of pathologies, such as cerebral ischemia,

83 aneurysms and *Moyamoya* Syndrome (MMS). The latter, in turn, is characterized by  
84 progressive stenosis or occlusion of the internal carotid artery and its branches. For this  
85 reason, although lack of full knowledge regarding the natural history, symptoms, etiology  
86 and management of such syndrome, it is already known that routine vascular  
87 screening/assessment in NF-1 patients is necessary for early identification of this  
88 condition [12] . Using such approach, CVD in patients with NF-1 can be diagnosed since  
89 childhood. However, this diagnosis is often delayed, as not all children with NF-1 undergo  
90 neuroimaging tests [13]. Furthermore, CVDs are still one of the major causes of death,  
91 with almost six million people annually [14], aside from being associated with significant  
92 morbidity worldwide, which makes them an important public health problem [15]. When  
93 CVD are detected early, proper clinical management is able to minimize its impact on  
94 adult life [11].

95 Therefore, detailed studies on the association between NF-1 and CVD are still needed  
96 [16]. In this present study, we performed a systematic review to summarize the body of  
97 evidence on the association between NF-1 and the development of CVD in children.  
98 Increasing knowledge in this field can drive development of more effective protocols to  
99 optimize diagnosis and therapy to reduce both mortality and the number of  
100 hospitalizations of these patients.

101

## 102 **MATERIALS AND METHODS**

### 103 **Ethics statement**

104 There were no patients directly involved in the research. The present study used publicly  
105 data from previously published studies to perform a systematic review. All information  
106 given to the research team was de-identified. Thus, the study was exempted from revision  
107 by the Institutional Review Board of the Instituto Gonçalo Moniz, Fundação Oswaldo  
108 Cruz, Salvador, Brazil, and did not require signed consent forms.

109

### 110 **Search Strategy**

111 A systematic review of NF-1 and its association with CVD in children aged between 0 to  
112 18 years old was performed, in accordance with the recommendations of the Preferred  
113 Reporting Items for Systematic Reviews and Meta-Analyses (PRISMA) report. Two  
114 independent reviewers (BBD and FHAG) conducted the research in the following  
115 databases: PubMed and EMBASE

116

117 The keywords used in the research were: "neurofibromatosis type 1", "recklinghausen  
118 disease", "children", "adolescents", "stroke", "moyamoya disease", "vascular diseases",  
119 "cerebrovascular disorders", "aneurysm", "congenital abnormalities". The search strategy  
120 used in PubMed and EMBASE is presented in the supplementary file 1. All articles  
121 published in English were searched, without time or population restriction of the study.  
122 Initially, titles and abstracts were read by the reviewers (Fig 1) and systematic reviews,  
123 letters to the editor, case reports and comments were excluded. We did an additional  
124 manual search of the reference lists from selected articles to identify eligible publications

125 that may not have appeared in our electronic search strategy. The search was conducted  
126 on May 15, 2020. This review was registered in the PROSPERO International Registry  
127 (registration number: CRD42020180942).

128

129 **Fig 1: Flowchart of the study selection process study characteristics.** Abbreviations: CVD:  
130 cerebrovascular disease.

131

### 132 **Data Extraction**

133 Inclusion criteria were: (1) cross-sectional, cohort or case-control studies; (2) studies  
134 focusing on NF-1 cerebrovascular disorders; (3) studies carried out with children (from 0  
135 to 18 years old) and (4) studies in which the diagnostic criteria for NF-1 recommended by  
136 the NIH were used. Articles in a language other than English, duplicated or not yet  
137 published, as well as studies that were not about CVD in patients with NF-1 or that  
138 presented cerebrovascular events associated with trauma, neoplasia, radiation treatment  
139 or use of medications were excluded. The selection of the studies was divided into 4  
140 steps: 1 reading of the titles, (2) reading of the article abstracts, (3) evaluation of the full  
141 articles selected from the previous step and inclusion of other studies present in the  
142 reference lists of the selected articles, (4) selection of the studies to include in the  
143 systematic review. Data extraction was performed independently by two authors (BBD  
144 and FHAG) and the discrepancies between the reviewers were resolved by consensus  
145 after discussion with more experienced authors (MBAG, BBA). A table for data extraction  
146 was built by each reviewer before writing the manuscript. The table included information  
147 on all relevant variables in each retrieved study.

148

149

## 150 **Data Analysis**

151 All studies addressed the following variables to assess the relationship between NF-1  
152 and CVD in children: age at diagnosis of NF-1, age at the time of image examination to  
153 identify CVD, cerebrovascular alteration found, affected vessels, method used for the  
154 diagnosis of NF-1, type of image examination performed, associated clinical  
155 manifestations and neurosurgery indication(Table 1).

156

## 157 **Quality Assessment**

158 The methodological quality of the studies included in the meta-analysis was assessed  
159 using the Newcastle-Ottawa Scale (NOS) (Table 2) [17]. NOS scores of 0–3, 4–6 and  
160 7–9 were considered to be low, moderate and high quality, respectively. The overall  
161 methodological quality was then summarized based on the observed quality trends.

162



| Study (author, year)  | Country                  | Type of study        | Sample size                                      | Age of patients at NF1 diagnosis | Age of patients at image study  | Cerebrovascular alteration                                                          | Affected vessel             | Image study used                                    | Diagnosis os NF1                     | Clinical manifestations                                                                                                                                                                                                                                                                                                                              | Neurosurgery                                                                             |
|-----------------------|--------------------------|----------------------|--------------------------------------------------|----------------------------------|---------------------------------|-------------------------------------------------------------------------------------|-----------------------------|-----------------------------------------------------|--------------------------------------|------------------------------------------------------------------------------------------------------------------------------------------------------------------------------------------------------------------------------------------------------------------------------------------------------------------------------------------------------|------------------------------------------------------------------------------------------|
| (Rosser et al., 2004) | United States of America | Case Series          | Total (353);<br>MRI (316);<br>Vasculopathy (8)   | Mean, 1.4 years                  | Mean, 7.3 years                 | Stenosis / occlusion, cerebral ischemia, ectasia, Moyamoya, aneurysm and hypoplasia | PCA, ICA and MCA            | MRI, MRA and Conventional Angiography               | NIH diagnostic criteria <sup>a</sup> | Hemiparesis (1), seizure (1) and asymptomatic (7)                                                                                                                                                                                                                                                                                                    | 3 patients (exploratory surgery, encephaloduroarteriosynangiostomy and pial synangiosis) |
| (Cairns et al, 2008)  | Australia                | Case series          | Total (698);<br>MRI (144) ;<br>Vasculopathy (7)  | Ranged from 18 months to 5 years | Mean, 6.8 years                 | Hypoplasia, stenosis/occlusion, collateral vessels                                  | ACA, MCA, PCoA, ICA and PCA | MRI, MRA and Conventional Angiography               | NIH diagnostic criteria <sup>a</sup> | Asymptomatic (5), seizure (1), hemiparesis (1), paraesthesia (1) and TIA (1)                                                                                                                                                                                                                                                                         | 1 patient (pial synangiosis)                                                             |
| (Rea et al, 2009)     | Canada                   | Retrospective Cohort | Total (419) ;<br>MRI (266);<br>Arteriopathy (17) | Median, 2 years                  | Median, 5.3 years (10 children) | Stenosis / occlusion, aneurysm, Moyamoya                                            | ICA, MCA and ACA            | MRI, MRA, CT, angio-CT and Conventional Angiography | NIH diagnostic criteria <sup>a</sup> | Seizure (3), hemiparesis (1), speech delay (2), Bell's palsy (1), learning disability (4), paraesthesia (1), weakness (2), hyperreflexia (2), ADD (1), hyperphagia (1), episodic dysphasia (1), infantile spasms (1), hypertonia (1), clonus (1), ptosis (1), RAPD (1), hemibalism (1), dystonia (1), aphasia (1), AIT (1) and fine motor delay (1). | 6 patients (pial synangiosis)                                                            |

|                       |                          |                      |                                                               |                           |                            |                                                                                                  |                           |                                                                                                                                     |                                      |                                                                               |                                                          |
|-----------------------|--------------------------|----------------------|---------------------------------------------------------------|---------------------------|----------------------------|--------------------------------------------------------------------------------------------------|---------------------------|-------------------------------------------------------------------------------------------------------------------------------------|--------------------------------------|-------------------------------------------------------------------------------|----------------------------------------------------------|
| (Ghosh et al, 2012)   | United States of America | Case Series          | Total (398);<br>MRI (312);<br>MRA (143);<br>Vasculopathy (15) | Mean, 4.3 ± 3.5 years     | Mean, 11.7 SD ± 7.3 years  | Stenosis/occlusion, cerebral ischemia, Moyamoya                                                  | ICA, MCA, PCA and VA      | MRI, MRA, angio-CT and Conventional Angiography                                                                                     | NIH diagnostic criteria <sup>a</sup> | Headache (5), seizure (2) and asymptomatic (7)                                | 1 patient (encephaloduroarteriomyosynangiosis procedure) |
| (Kaas et al, 2012)    | United States of America | Cross Sectional      | Total (181);<br>Neuroimaging (77); cerebral vasculopathy (12) | Median 8 years (n=14)     | Ranged from 3 to 13 years  | Moyamoya, stenosis/occlusion, tortuosity, elongation, displacement, developmental venous anomaly | ACA, MCA, ICA, PCA and VA | MRI, MRA, Conventional Angiography                                                                                                  | NIH diagnostic criteria <sup>a</sup> | Weakness (1), reduced responsiveness (1) and asymptomatic (10)                | 3 patients (2 - revascularization surgery)               |
| (Han et al, 2014)     | China                    | Case Series          | Total (6)                                                     | Median, 2.7 ± 2.1 years   | Mean, 11.4 SD ± 8.3 years  | Moyamoya, stenosis / occlusion, intracerebral hemorrhage                                         | ICA, MCA and ACA          | MRI, MRA, DSA, SPECT (Conventional digital subtraction angiography, Brain perfusion single-photon emission computerised tomography) | NIH diagnostic criteria <sup>a</sup> | TIA (3), headache (1), intracerebral hemorrhage (1) and cerebral ischemia (1) | 5 patients (Revascularization surgery)                   |
| (Santoro et al, 2017) | Italy/France             | Retrospective cohort | Total (18)                                                    | Mean, 2.93 SD± 3.03 years | Mean, 7.43 SD ± 4.27 years | Stenosis/occlusion                                                                               | MCA, ACA and PCA          | MRI, MRA and DSA                                                                                                                    | NIH diagnostic criteria <sup>a</sup> | Hemiparesis (2), seizure (2), headache (6) and asymptomatic (8)               | 11 patients (revascularization surgery)                  |

165 **Table Note:** <sup>a</sup>National Institutes of Health (NIH) Consensus Development Conference diagnostic criteria: consists of the  
166 presence of two or more of the following characteristics - six or more cafe au lait macules over 5 mm in greatest diameter in  
167 prepubertal individuals and over 15 mm in greatest diameter in post pubertal individuals; two or more neurofibromas of any type  
168 or one plexiform neurofibroma; freckling in the axillary or inguinal regions; optic glioma; two or more Lisch nodules (iris

169 hamartomas); a distinctive osseous lesion such as sphenoid dysplasia or thinning of long bone cortex, with or without  
170 pseudarthrosis and a first-degree relative (parent, sibling, or offspring) with NF-1 by the above criteria.

171 **Abbreviations:** NF-1:Neurofibromatosis Type 1; PCA: posterior cerebral artery; MCA: middle cerebral artery; ACA: anterior  
172 cerebral artery; ICA: internal carotid artery; PCoA: posterior communicating artery; VA: vertebral artery; MRI: magnetic  
173 resonance imaging; MRA: magnetic resonance angiography; CA: conventional angiography; CT: computed tomography; angio-  
174 CT: computed tomography angiography; DSA: digital subtraction angiography; SPECT: Brain perfusion single-photon emission  
175 computerized tomography; TIA: transient ischemic attack; RAPD: DPAR: relative afferent pupillary defect; ADD: attention deficit  
176 disorder; SD: standard variation

177

178

179

180 **Table 2: Quality Assessment of Studies Included in the Systematic Review by Newcastle Ottawa Scale.**

181

| Source                | Newcastle Ottawa Scale | Selection |   |   |    | Comparability |     | Outcome/Exposure |   |     | Overall            |
|-----------------------|------------------------|-----------|---|---|----|---------------|-----|------------------|---|-----|--------------------|
|                       |                        | 1         | 2 | 3 | 4  | 5A            | 5B  | 6                | 7 | 8   | Score <sup>a</sup> |
| (Kaas et al, 2012)    | Cross-Sectional        | 0         | * | * | ** | N/A           | N/A | **               | 0 | N/A | 6                  |
| (Santoro et al, 2017) | Retrospective          |           |   |   |    |               |     |                  |   |     |                    |
|                       | Cohort                 | *         | 0 | * | *  | *             | N/A | *                | * | *   | 7                  |
| (Rea et al, 2009)     | Retrospective          |           |   |   |    |               |     |                  |   |     |                    |
|                       | Cohort                 | *         | 0 | * | *  | N/A           | N/A | *                | * | N/A | 6                  |

182 **Table Note:** \*Indicates the score given to the study according to the NOS quality assessment scale.

183 Abbreviations: NA, not applicable;

184 <sup>a</sup> Determined by the total number of stars assigned to the study: 0–3 stars = poor; 4–5 stars = fair; 6–7 stars = good; 8–9/10 stars =

185 excellent.

## 186 **RESULTS**

### 187 **Study characteristics and quality evaluation**

188 Initially, 243 studies were selected from the main database search. After detailed review,  
189 70 duplicates were removed and 166 articles were excluded: 83 did not address CVD, 5  
190 addressed CVD triggered by other factors, such as a particular medicine or neoplasms,  
191 18 were case reports, 4 were letters to the editor and 2 were brief communications (Figure  
192 1). Subsequently, 6 other studies were excluded for not being performed in humans, 9 for  
193 not being performed in children, 27 were not found or published and 2 were in a language  
194 other than English (Polish and German) (Fig 1). Finally, 10 studies that did not provide  
195 sufficient clinical data on the pediatric population were still excluded. The remaining  
196 studies (7), which describe NF-1 associated with CVD in children, were included in this  
197 review. Fig 1 summarizes the article selection process.

198

199 Among the seven selected studies, 2 had a medical record review project (retrospective  
200 cohort) 1 was a cross-sectional study and 4 were series of cases. In all of them, the NF-  
201 1 diagnostic criterion used was that developed by the NIH. Moreover, the eligible studies  
202 (cohort and cross-sectional) for the evaluation of the Newcastle-Ottawa Scale (NOS)  
203 were of good quality presenting between 6-7 stars (Table 2). Such studies were  
204 performed out in six different countries: one in Australia, one in Canada, one in China,  
205 one in Italy and France and three of them in different cities in the United States of America  
206 (Washington DC, Cleveland and Baltimore) (Fig 2).

207

208 **Fig. 2: Distribution of studies used around the world.**

209

## 210 **Cerebrovascular alterations presented higher frequency at Willis polygon**

211 In this review, we detected 12 types of cerebrovascular changes significantly associated  
212 with NF-1 and / or disease progression in children (Table 1). In six of the seven studies  
213 the internal carotid artery was the most affected vessel among patients: 75% in the study  
214 by Rosser et al., 80% in the study by Ghosh et al., and 100% in the studies by Read et  
215 al., Kaas et al., Han et al. and Santoro et al. In the study by Cairns et al. the most affected  
216 vessels were those of the Willis polygon (85,7% of patients) (Table 1 and Fig 3).

217

218 **Fig. 3: Flow diagram summarizing the main results of the systematic review.** Abbreviations: NF-  
219 1:Neurofibromatosis Type 1; MRI: magnetic resonance imaging; MRA: magnetic resonance  
220 angiography; CA: conventional angiography; CT: computed tomography; angio-CT: computed  
221 tomography angiography; SPECT: Brain perfusion single-photon emission computerized tomography.

222

## 223 **Radiologic investigation**

224 The diagnosis of NF-1 was performed prior to brain imaging exams in all studies, showing  
225 that many CVDs could have been previously diagnosed, which possibly would prevent  
226 complications or more invasive treatments. The most frequently performed imaging tests  
227 were Magnetic Resonance Angiography (MRA) and Magnetic Resonance Imaging (MRI)  
228 performed in 100% of the studies evaluated followed by Conventional Angiography (CA)  
229 - 71.4%, Computed Tomography Angiography (Angio-CT) and Digital Substraction  
230 Angiography DSA - 28.5% each and finally Brain Perfusion Single-photon Emission  
231 Computerized Tomography (SPECT) and Computed Tomography (CT) - 14.2% each.  
232 (Table 1 and Fig 3).

233

234 **The heterogeneous spectrum of clinical manifestations and delays in diagnosis of**  
235 **CVD**

236 NF-1 has been closely associated with *MMS* vasculopathy in five studies and its  
237 presentation is related to worse outcomes and more evident clinical manifestations. In the  
238 study by Rea et al., It was possible to correlate NF-1 with the difficulty of developing  
239 cognitive functions such as reading, speaking and the ability to maintain attention.  
240 Furthermore, in the study by Ghosh et al, five of the fifteen patients evaluated presented  
241 headache as the only clinical manifestation that could indicate CVD. Thus, headache is  
242 possibly an important warning sign in this population.

243  
244 In general, the clinical manifestations found were very heterogeneous (Fig 3). Patients  
245 with a history of paresthesia, seizures, and even severe strokes were observed, among  
246 other manifestations. However, it is important to note that until the time of diagnosis of  
247 CVD, 44,5% of the patients were asymptomatic, which shows the importance of screening  
248 in childhood. Furthermore, the type of surgery most reported in the studies evaluated was  
249 *pial synangiosis* surgery (five of seven studies) followed by revascularization surgery  
250 (three of seven studies) (Fig 3). In the study by Santoro et al. patients who underwent  
251 surgical treatment (50%) exhibited global clinical stability.

252

254 **DISCUSSION**

255 NF-1 is a rare, autosomal dominant disease [18], which has a strong relationship with  
256 vascular malformations [19] and whose first symptoms commonly appear in childhood  
257 [20]. Such vascular alterations, although they can occur in any part of the child body [8],  
258 have a greater severity when presented in the central nervous system (CNS) [10]. For  
259 this reason, knowledge of the association between NF-1 and cerebrovascular diseases  
260 triggered by this disease can contribute to a better understanding of the pathophysiology  
261 of NF-1 manifestations in the CNS, as well as guide development of novel approaches to  
262 prevent cerebrovascular events in children with NF-1. This systematic review  
263 demonstrated that the use of early imaging methods is associated with early interventions  
264 and, consequently, more favorable outcomes, even in previously asymptomatic children.

265  
266 Our search identified that all studies selected for systematic analysis reported that some  
267 artery of the Willis polygon was affected [9, 11-13, 21, 22] , of which the internal carotid  
268 artery is shown as the main site of alteration among all evaluated patients. Importantly,  
269 the branches generated by the internal carotid artery are the middle cerebral artery and  
270 anterior cerebral artery [23] , responsible for predominantly motor and somatosensory  
271 deficits [24]. Thus, the manifestations presented can vary from a focal motor deficit to an  
272 aphasia [13] , which makes early diagnosis difficult [25] since depending on the age of  
273 the child communication is still not effective and motor skills has not well-developed.  
274 Therefore, it is crucial that more studies are developed to assess the need for periodic  
275 screening in this group through brain imaging.

276



277 Of note, approximately 44.5% of the patients were asymptomatic at the time of the  
278 imaging exam, which showed vascular changes and rises the need of early screening. At  
279 first glance, this fact counts against the NIH NF-1 management manuals since brain  
280 imaging is only indicated in the presence of symptoms. In addition, in the study by Ghosh  
281 et al, 33.4% of the patients evaluated presented headache as the only symptom, which  
282 can be justified by the fact that the most common vascular alteration reported in all studies  
283 was arterial stenosis / occlusion. Moreover, the comparison between the selected studies  
284 about children with NF-1 and cerebrovascular diseases revealed that the earlier the  
285 imaging tests are performed, even when the children are asymptomatic at the time of the  
286 examination could contribute to better interventions. This corroborates the hypothesis that  
287 the performance of periodic and early examinations can impact on morbidity and mortality  
288 and on the quality of life of children with NF-1.

289  
290 The available evidence allowed us to conclude that neurological manifestations of NF-1  
291 in the pediatric group are heterogeneous and difficult to diagnose clinically, and in most  
292 cases, it is necessary to perform a complementary imaging test. In addition, when these  
293 manifestations are associated with MMS the children have a worse prognosis [22].  
294 Notably, *MMS* is described with the severity of symptoms presented by children [12], what  
295 can be seen in six of the seven studies evaluated. Moreover, the neurosurgery most  
296 performed by the studies was pial synangiosis surgery, widely used for the treatment of  
297 *MMS* and reduction of its clinical manifestations. An important observation is that the  
298 surgical interventions performed were also more successful when associated with early  
299 imaging tests, which corroborates the idea of early screening for recognition of vascular

300 malformations on the CNS. The tests most used by the studies evaluated were MRA and  
301 MRI, although there is no consensus on which is best test to be performed or the  
302 periodicity established for that execution.

303

304 Our study has important limitations. Some studies did not contain sufficient information  
305 about the pediatric group, not allowing an adequate assessment. In addition, most studies  
306 are only descriptive, not performing statistical analysis of the data presented, which made  
307 it impossible to perform a meta-analysis. It is also important to highlight the low availability  
308 and quality of the studies carried out about this theme, which present a very variable  
309 number of patients and a little detailed analysis of each individual patient, which made  
310 comparisons between groups difficult. Besides, due to the small amount of evidence  
311 available, it was necessary to use the series of cases, which brings an important limitation  
312 since we were unable to apply an adequate quality scale to the studies. In addition, the  
313 available data on the chronology of the imaging exams and the reason for the indication  
314 of one method within the other is very scarce, which makes it difficult to interpret these  
315 parameters. Despite this, as it is a rare disease that affects 1 in every 3000 live births  
316 [26]and has major complications[10], we believe that this systematic review reaches the  
317 proposed ideas.

318

319 The results of this systematic review show that the possible implementation of screening  
320 measures using imaging methods has the potential to improve the early diagnosis of  
321 cerebrovascular alterations in children with NF-1 as well as early intervention. This could  
322 potentially reduce the number of deaths and sequelae caused by the diagnosis of

323 vascular change only when an injury is already installed. Even so, more robust and better-  
324 quality studies are needed to clarify the frequency and which exams should be  
325 recommended within each age group. An evaluation of imaging methods in isolation and  
326 in conjunction with clinical parameters is necessary in order to draw a better line of care  
327 for these children since birth.

328

329 **Acknowledgments:** The authors thank to Dr. Carla Daltro or helping with the initial  
330 version of this paper.

331

332 **Privacy statement:** the authors guarantee that all data were anonymized and complies  
333 with the Helsinki declaration.

334

335 **Availability of data and materials:** The datasets used and/or analyzed during the  
336 current study are all publicly available.

337

338

339

340

341

342

343

344

345

346

347

348

349

350

## 351 REFERENCES

- 352 1. Souza JF, Toledo LL, Ferreira MC, Rodrigues LO, Rezende NA. [Neurofibromatosis type  
353 1: more frequent and severe than usually thought]. *Rev Assoc Med Bras* (1992). 2009;55(4):394-  
354 9. Epub 2009/09/15. doi: 10.1590/s0104-42302009000400012. PubMed PMID: 19750304.
- 355 2. Evans DG, Howard E, Giblin C, Clancy T, Spencer H, Huson SM, et al. Birth incidence  
356 and prevalence of tumor-prone syndromes: estimates from a UK family genetic register service.  
357 *Am J Med Genet A*. 2010;152A(2):327-32. Epub 2010/01/19. doi: 10.1002/ajmg.a.33139.  
358 PubMed PMID: 20082463.
- 359 3. Friedman JM. Neurofibromatosis 1. In: Adam MP, Ardinger HH, Pagon RA, Wallace SE,  
360 Bean LJH, Stephens K, et al., editors. *GeneReviews*((R)). Seattle (WA)1993.
- 361 4. Ferner RE, Gutmann DH. Neurofibromatosis type 1 (NF1): diagnosis and management.  
362 *Handb Clin Neurol*. 2013;115:939-55. Epub 2013/08/13. doi: 10.1016/B978-0-444-52902-  
363 2.00053-9. PubMed PMID: 23931823.
- 364 5. Gkampeta A, Hatzipantelis E, Kouskouras K, Pavlidou E, Pavlou E. Ischemic cerebral  
365 infarction in a 5-year-old male child with neurofibromatosis type 1. *Childs Nerv Syst*.  
366 2012;28(11):1989-91. Epub 2012/05/10. doi: 10.1007/s00381-012-1790-0. PubMed PMID:  
367 22570170.
- 368 6. Yilmaz H, Erkin G, Gumus H, Nalbant L. Coexistence of Neurofibromatosis Type-1 and  
369 MTHFR C677T Gene Mutation in a Young Stroke Patient: A Case Report. *Case Rep Neurol Med*.  
370 2013;2013:735419. Epub 2013/03/28. doi: 10.1155/2013/735419. PubMed PMID: 23533858;  
371 PubMed Central PMCID: PMC3600223.
- 372 7. Terry AR, Jordan JT, Schwamm L, Plotkin SR. Increased Risk of Cerebrovascular Disease  
373 Among Patients With Neurofibromatosis Type 1: Population-Based Approach. *Stroke*.  
374 2016;47(1):60-5. Epub 2015/12/10. doi: 10.1161/STROKEAHA.115.011406. PubMed PMID:  
375 26645253.
- 376 8. Sobata E, Ohkuma H, Suzuki S. Cerebrovascular disorders associated with von  
377 Recklinghausen's neurofibromatosis: a case report. *Neurosurgery*. 1988;22(3):544-9. Epub  
378 1988/03/01. doi: 10.1227/00006123-198803000-00016. PubMed PMID: 3129670.
- 379 9. Cairns AG, North KN. Cerebrovascular dysplasia in neurofibromatosis type 1. *J Neurol*  
380 *Neurosurg Psychiatry*. 2008;79(10):1165-70. Epub 2008/05/13. doi: 10.1136/jnnp.2007.136457.  
381 PubMed PMID: 18469031.
- 382 10. Giannantoni NM, Broccolini A, Frisullo G, Pilato F, Profice P, Morosetti R, et al.  
383 Neurofibromatosis type 1 associated with vertebrobasilar dolichoectasia and pontine ischemic  
384 stroke. *J Neuroimaging*. 2015;25(3):505-6. Epub 2014/09/19. doi: 10.1111/jon.12160. PubMed  
385 PMID: 25230986.

- 386 11. Ghosh PS, Rothner AD, Emch TM, Friedman NR, Moodley M. Cerebral vasculopathy in  
387 children with neurofibromatosis type 1. *J Child Neurol*. 2013;28(1):95-101. Epub 2012/04/26. doi:  
388 10.1177/0883073812441059. PubMed PMID: 22532547.
- 389 12. Santoro C, Di Rocco F, Kossorotoff M, Zerah M, Boddaert N, Calmon R, et al. Moyamoya  
390 syndrome in children with neurofibromatosis type 1: Italian-French experience. *Am J Med Genet*  
391 *A*. 2017;173(6):1521-30. Epub 2017/04/20. doi: 10.1002/ajmg.a.38212. PubMed PMID:  
392 28422438.
- 393 13. Rea D, Brandsema JF, Armstrong D, Parkin PC, deVeber G, MacGregor D, et al. Cerebral  
394 arteriopathy in children with neurofibromatosis type 1. *Pediatrics*. 2009;124(3):e476-83. Epub  
395 2009/08/27. doi: 10.1542/peds.2009-0152. PubMed PMID: 19706560.
- 396 14. Organization WH. The global burden of cerebrovascular disease 2000.
- 397 15. Dobkin B. The economic impact of stroke. *Neurology*. 1995;45(2 Suppl 1):S6-9. Epub  
398 1995/02/01. PubMed PMID: 7885589.
- 399 16. Zhang H, Zheng L, Feng L. Epidemiology, diagnosis and treatment of moyamoya disease.  
400 *Exp Ther Med*. 2019;17(3):1977-84. Epub 2019/03/15. doi: 10.3892/etm.2019.7198. PubMed  
401 PMID: 30867689; PubMed Central PMCID: PMC6395994.
- 402 17. Stang A. Critical evaluation of the Newcastle-Ottawa scale for the assessment of the quality  
403 of nonrandomized studies in meta-analyses. *Eur J Epidemiol*. 2010;25(9):603-5. Epub 2010/07/24.  
404 doi: 10.1007/s10654-010-9491-z. PubMed PMID: 20652370.
- 405 18. Mahalingam M. NF1 and Neurofibromin: Emerging Players in the Genetic Landscape of  
406 Desmoplastic Melanoma. *Adv Anat Pathol*. 2017;24(1):1-14. Epub 2016/12/13. doi:  
407 10.1097/PAP.000000000000131. PubMed PMID: 27941538.
- 408 19. Rosser TL, Vezina G, Packer RJ. Cerebrovascular abnormalities in a population of children  
409 with neurofibromatosis type 1. *Neurology*. 2005;64(3):553-5. Epub 2005/02/09. doi:  
410 10.1212/01.WNL.0000150544.00016.69. PubMed PMID: 15699396.
- 411 20. Chisholm AK, Anderson VA, Pride NA, Malarbi S, North KN, Payne JM. Social Function  
412 and Autism Spectrum Disorder in Children and Adults with Neurofibromatosis Type 1: a  
413 Systematic Review and Meta-Analysis. *Neuropsychol Rev*. 2018;28(3):317-40. Epub 2018/08/12.  
414 doi: 10.1007/s11065-018-9380-x. PubMed PMID: 30097761.
- 415 21. Kaas B, Huisman TA, Tekes A, Bergner A, Blakeley JO, Jordan LC. Spectrum and  
416 prevalence of vasculopathy in pediatric neurofibromatosis type 1. *J Child Neurol*. 2013;28(5):561-  
417 9. Epub 2012/07/27. doi: 10.1177/0883073812448531. PubMed PMID: 22832780; PubMed  
418 Central PMCID: PMC3496801.
- 419 22. Han C, Yang WZ, Zhang HT, Ye T, Duan L. Clinical characteristics and long-term  
420 outcomes of moyamoya syndrome associated with neurofibromatosis type 1. *J Clin Neurosci*.  
421 2015;22(2):286-90. Epub 2014/12/03. doi: 10.1016/j.jocn.2014.05.046. PubMed PMID:  
422 25443089.
- 423 23. Almeida JP, Reghin Neto M, Chaddad Neto F, E DEO. Anatomical considerations in the  
424 treatment of intracranial aneurysms. *J Neurosurg Sci*. 2016;60(1):27-43. Epub 2015/12/15.  
425 PubMed PMID: 26657135.
- 426 24. Defebvre L, Krystkowiak P. Movement disorders and stroke. *Rev Neurol (Paris)*.  
427 2016;172(8-9):483-7. Epub 2016/08/02. doi: 10.1016/j.neurol.2016.07.006. PubMed PMID:  
428 27476417.
- 429 25. Cnossen MH, Moons KG, Garssen MP, Pasmans NM, de Goede-Bolder A, Niermeijer MF,  
430 et al. Minor disease features in neurofibromatosis type 1 (NF1) and their possible value in  
431 diagnosis of NF1 in children < or = 6 years and clinically suspected of having NF1.

432 Neurofibromatosis team of Sophia Children's Hospital. *J Med Genet.* 1998;35(8):624-7. Epub  
433 1998/08/27. doi: 10.1136/jmg.35.8.624. PubMed PMID: 9719365; PubMed Central PMCID:  
434 PMC1051384.  
435 26. Alves Junior SF, Zanetti G, Alves de Melo AS, Souza AS, Jr., Souza LS, de Souza Portes  
436 Meirelles G, et al. Neurofibromatosis type 1: State-of-the-art review with emphasis on pulmonary  
437 involvement. *Respir Med.* 2019;149:9-15. Epub 2019/03/20. doi: 10.1016/j.rmed.2019.01.002.  
438 PubMed PMID: 30885426.



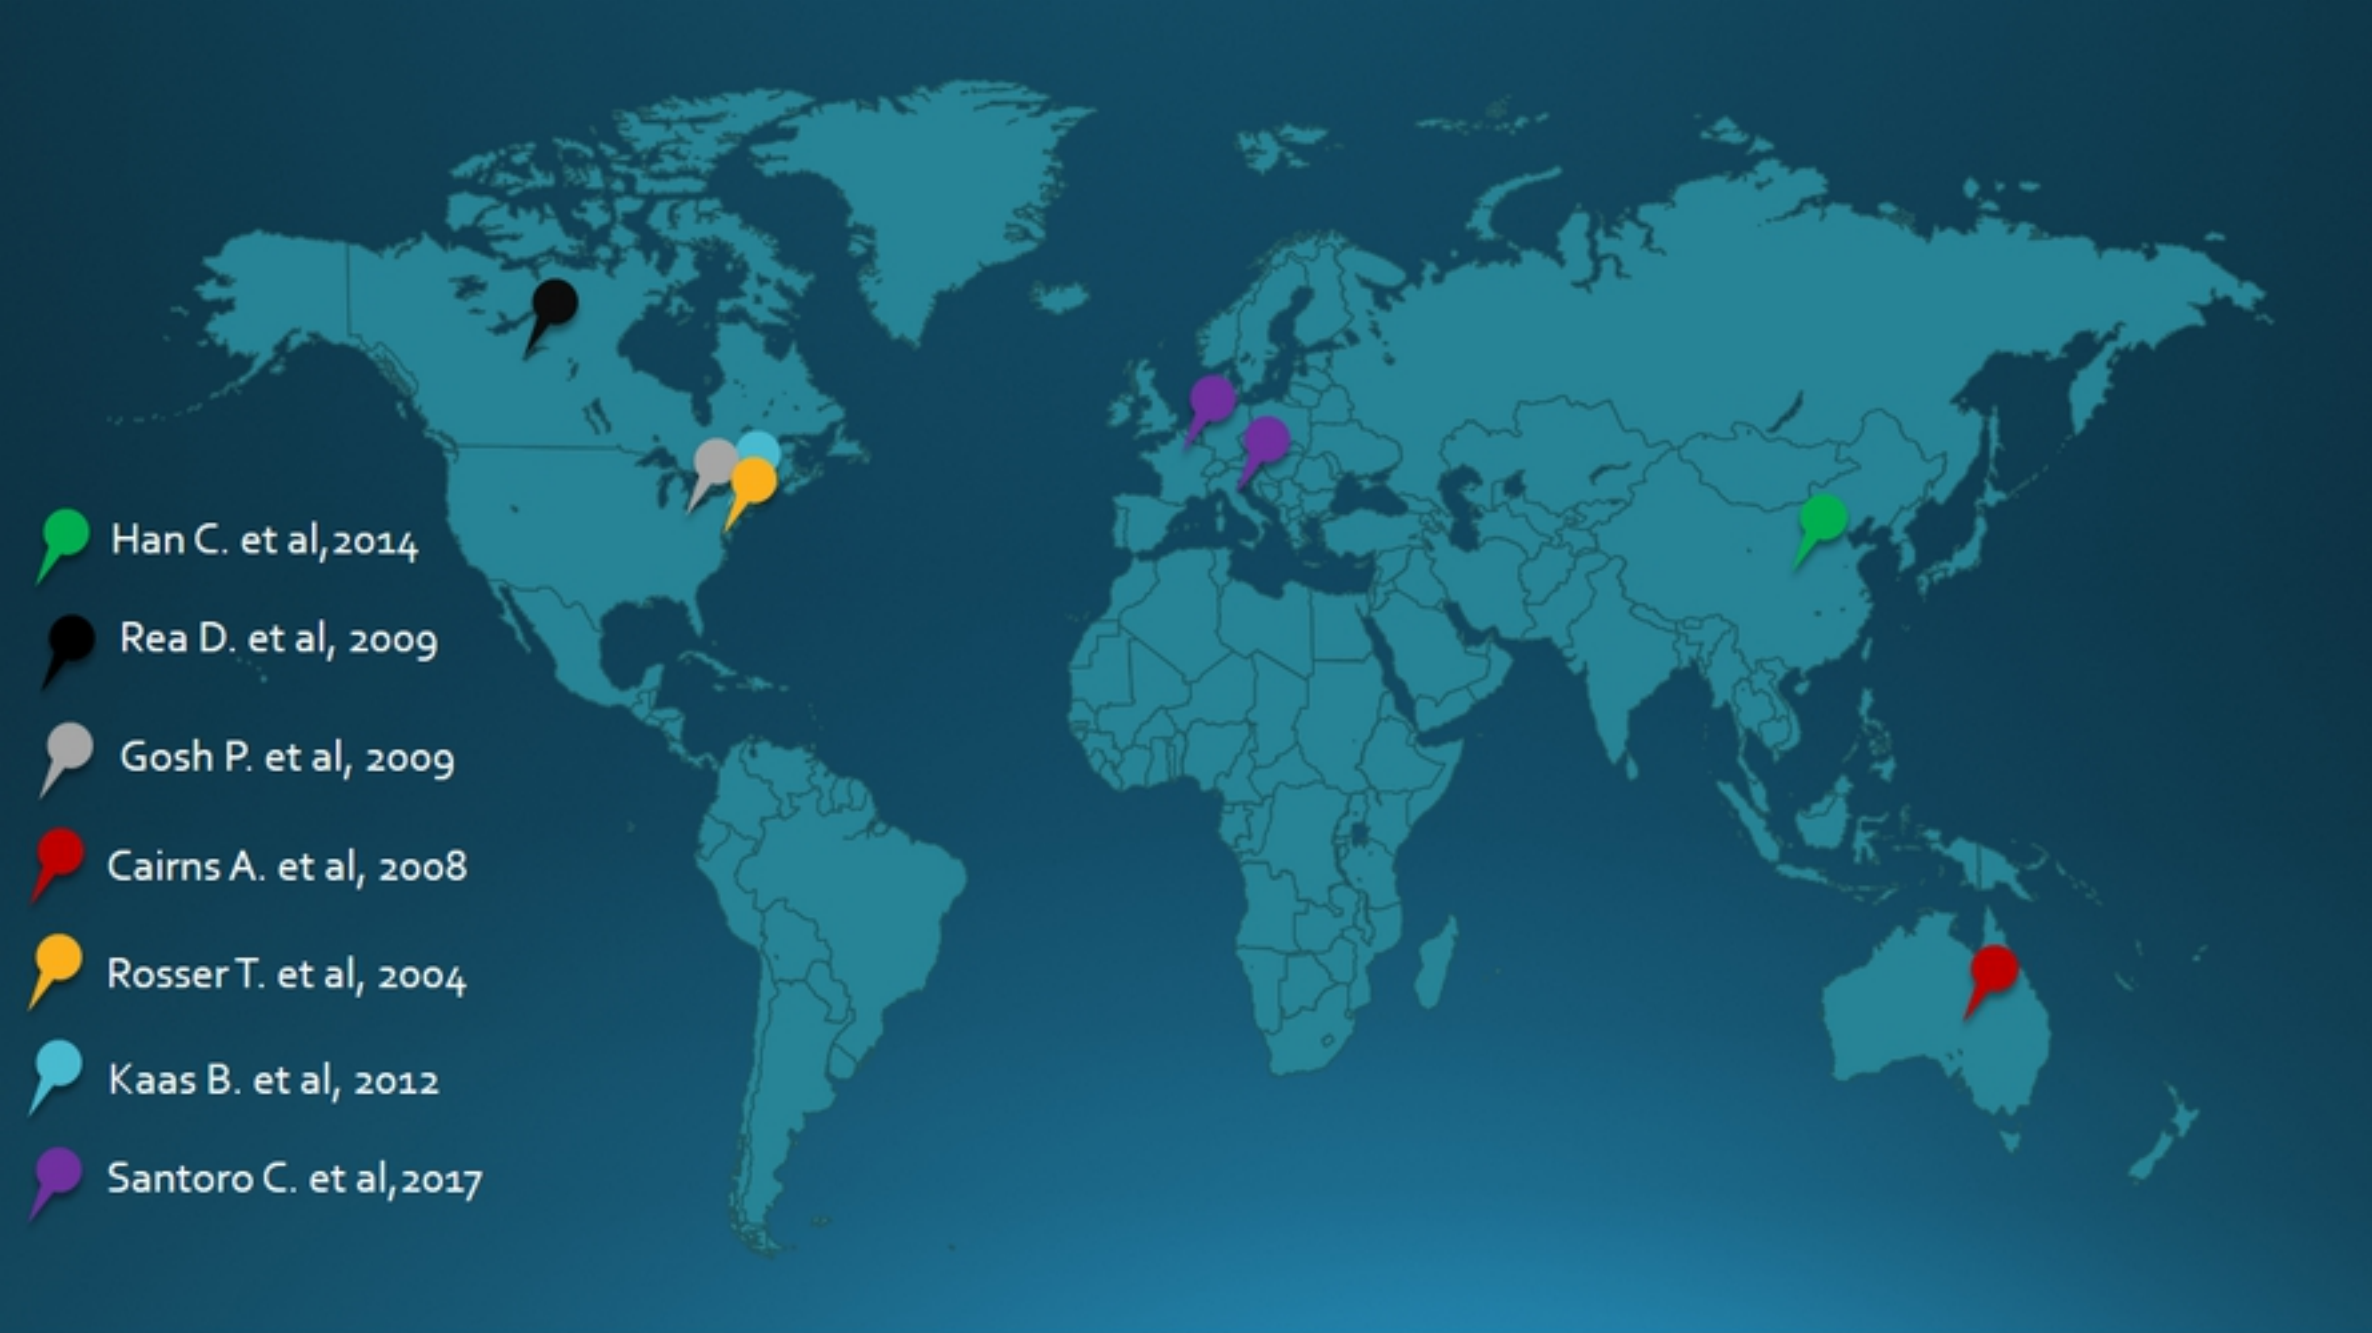

Figure 2



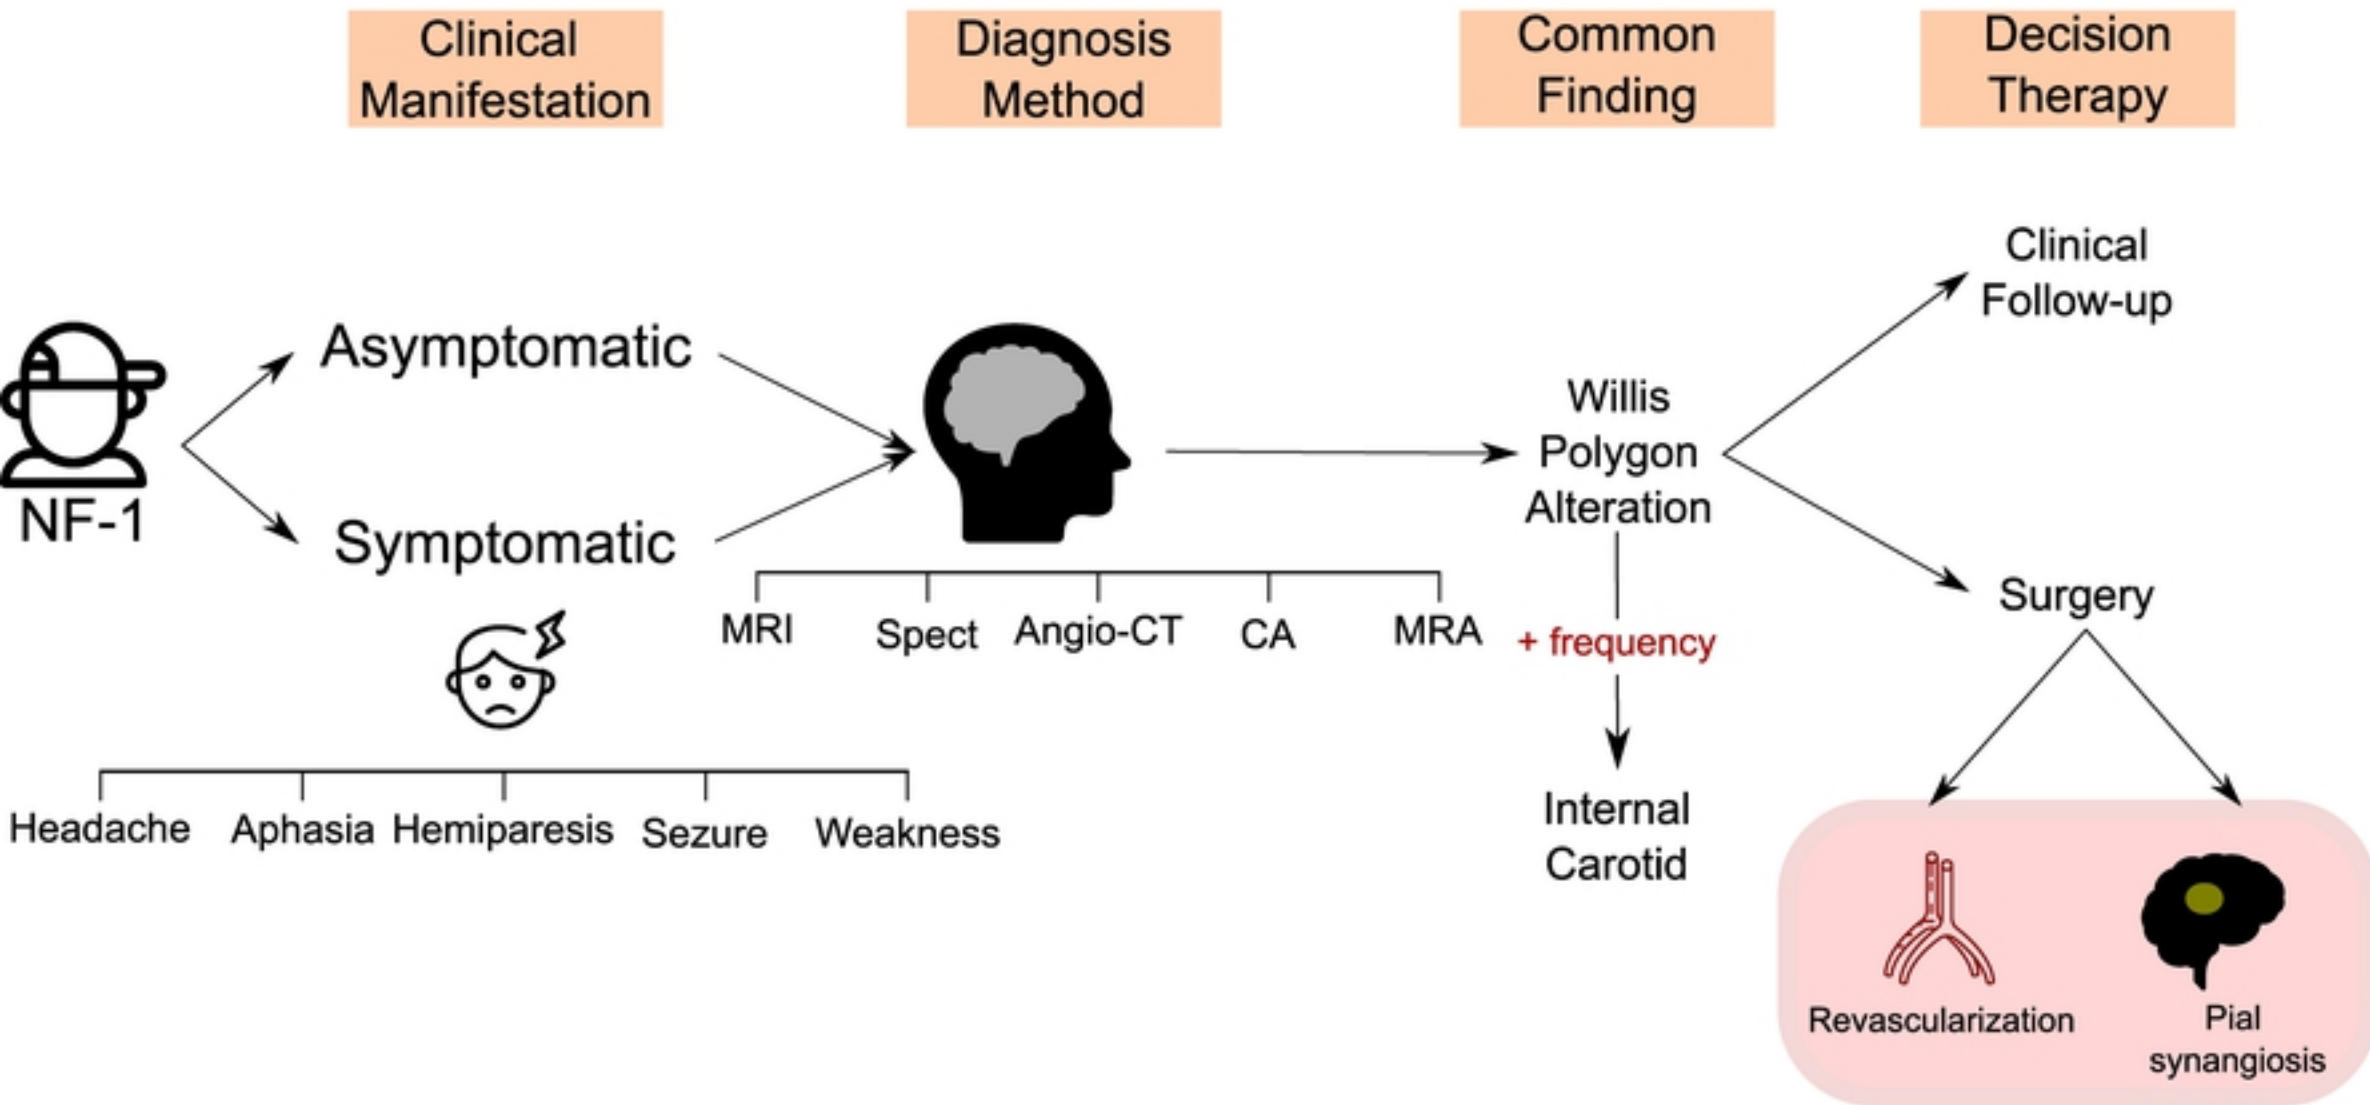

Figure 3

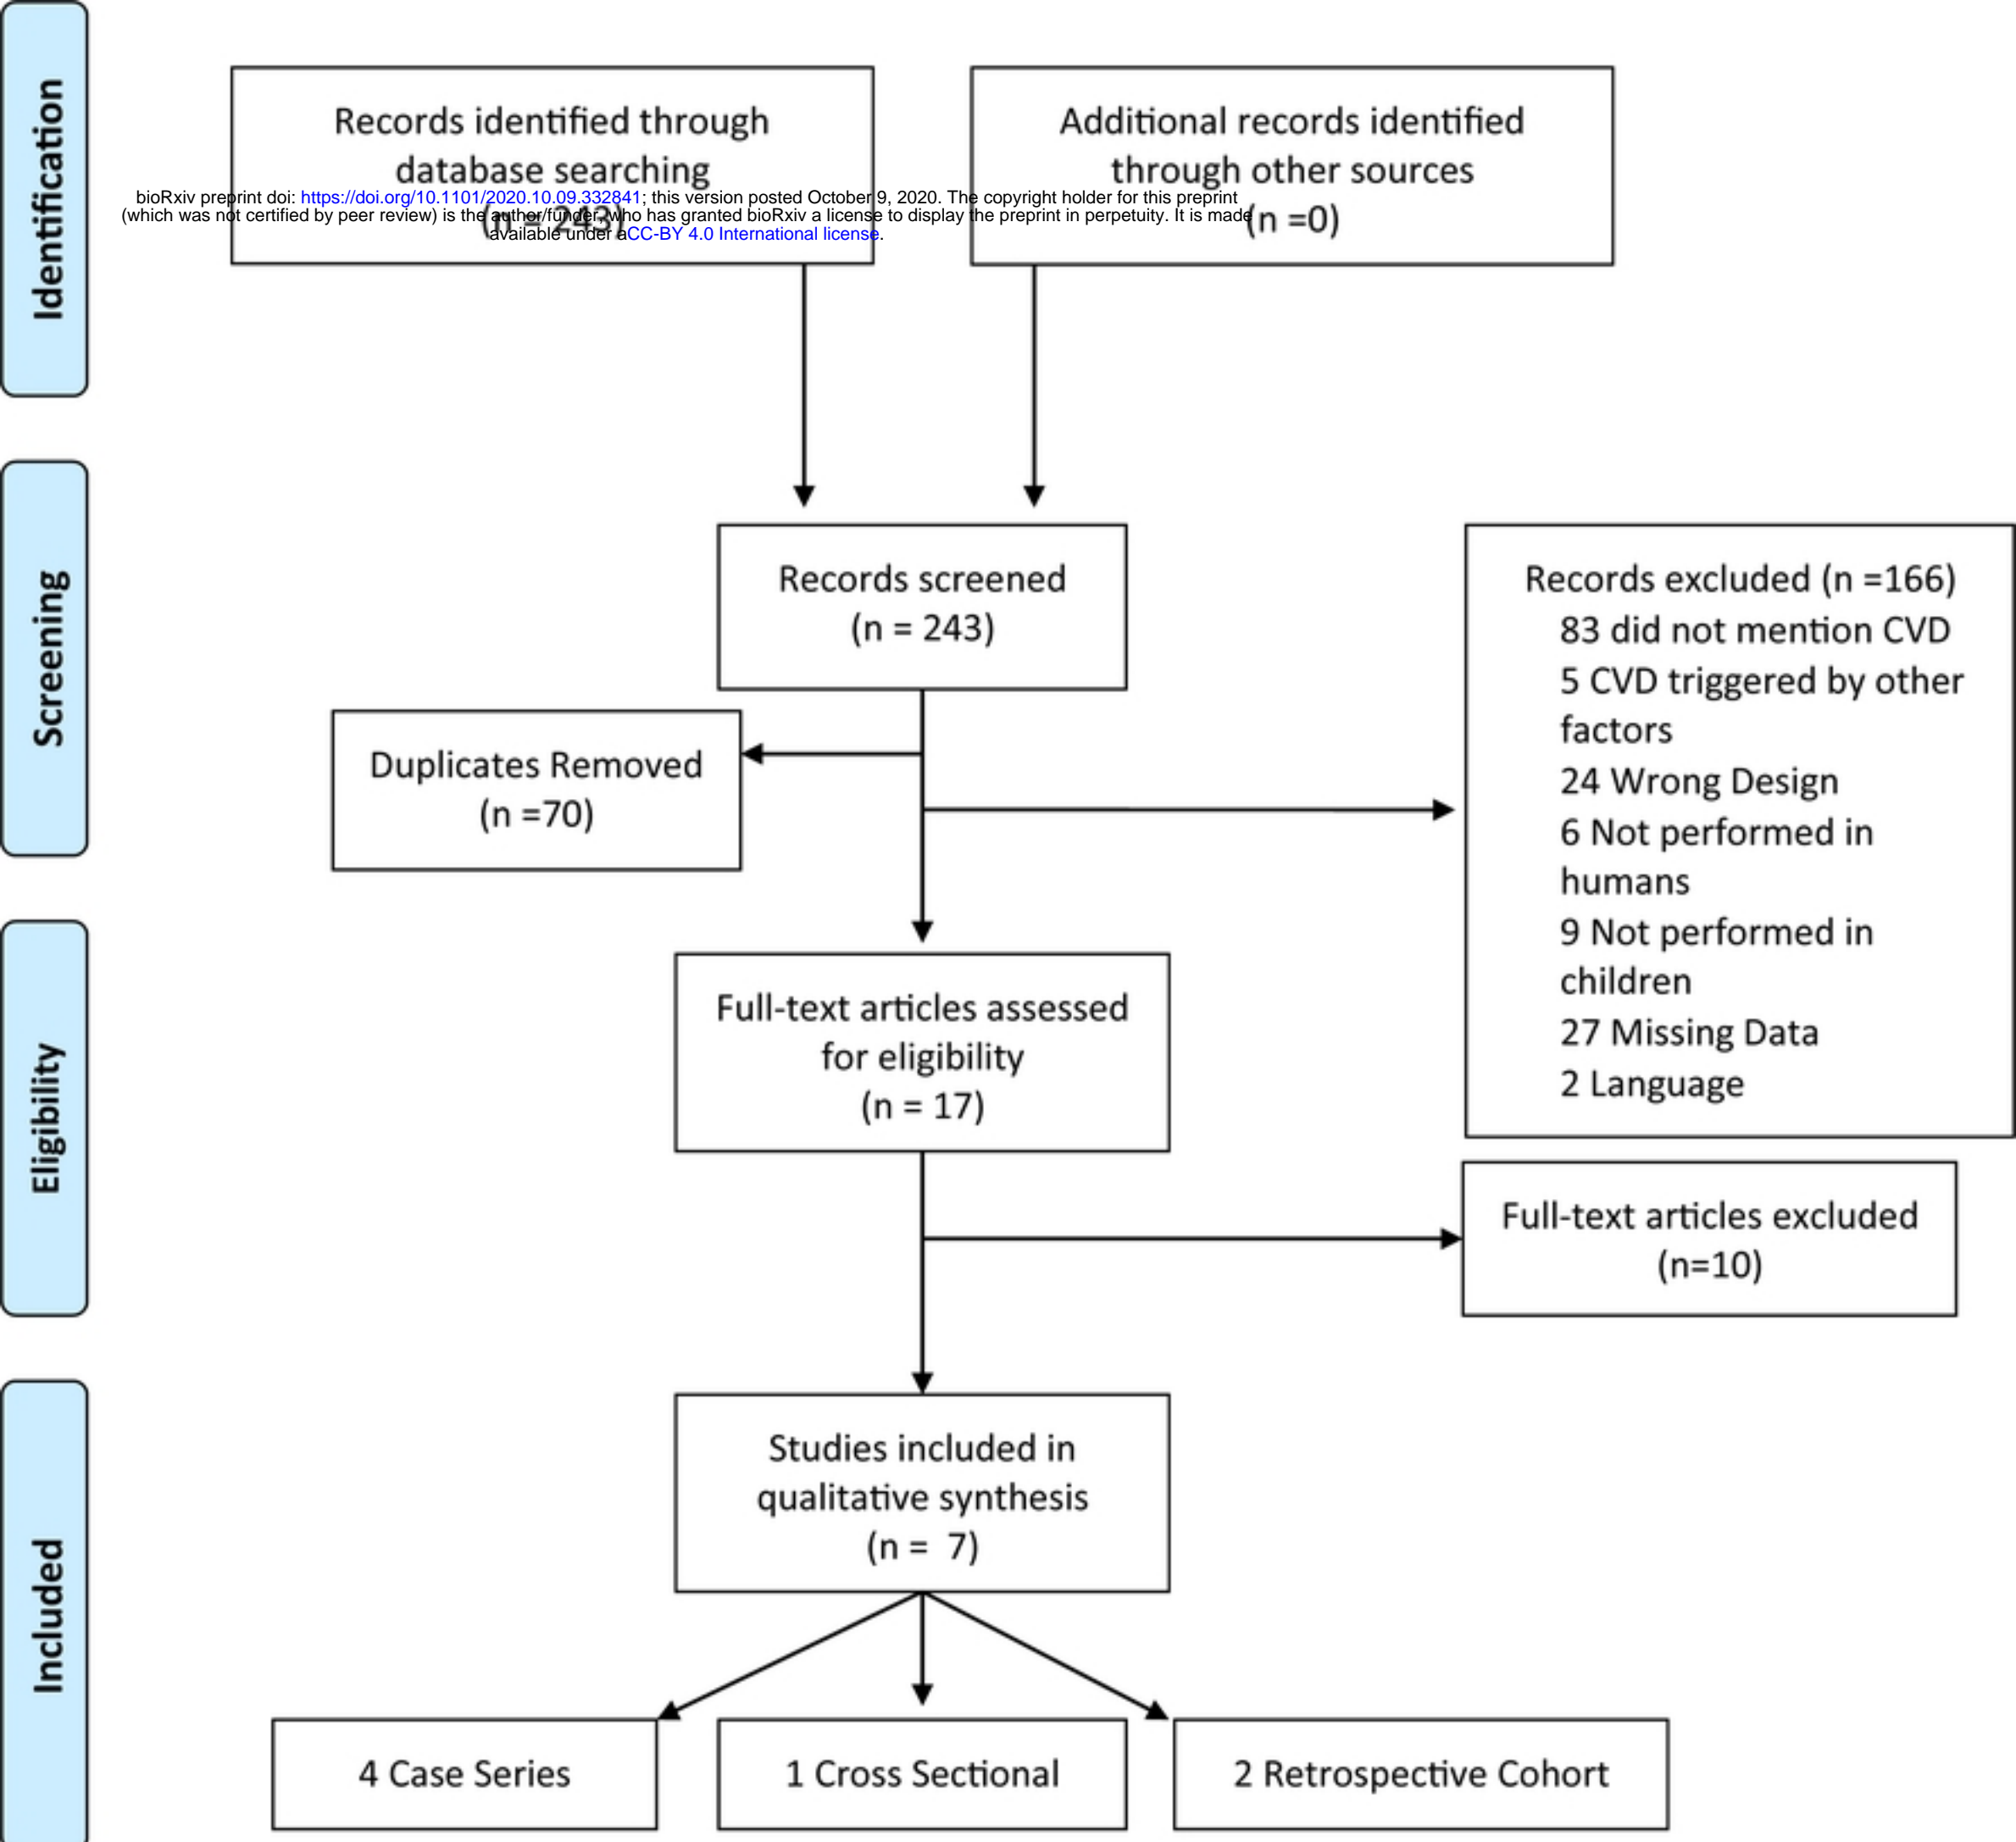

Figure 1
